# Supplementary material for: Elucidating the correlation between the prelithiation concentration of a LixSi anode and performance of all-solid-state lithium–sulfur batteries
Source: Royal Society of Chemistry journal article supplement (doi:10.1039/d4ta07492k), 2025-01-01
Supplement: d4ta07492k1.pdf [file d4ta07492k1.pdf]

## Supplementary Information

### **Elucidating the correlation between the prelithiation concentration of a $\text{Li}_x\text{Si}$ anode and performance of all-solid-state lithium–sulfur batteries**

Min Ju Kim, Yu Hong Jeong, Sung Kang, Jungjae Park, Jung Hoon Song, Tae Ho Shin and Hyung-Tae Lim\*

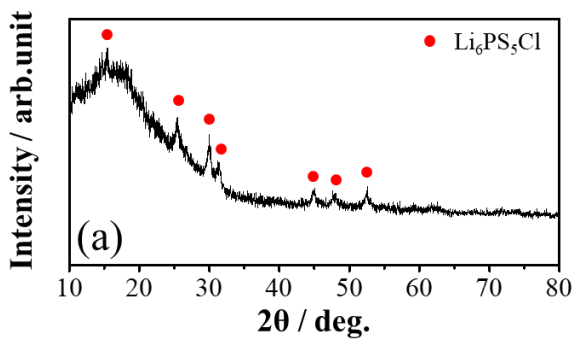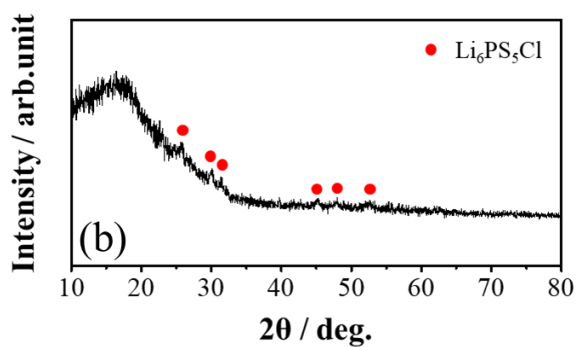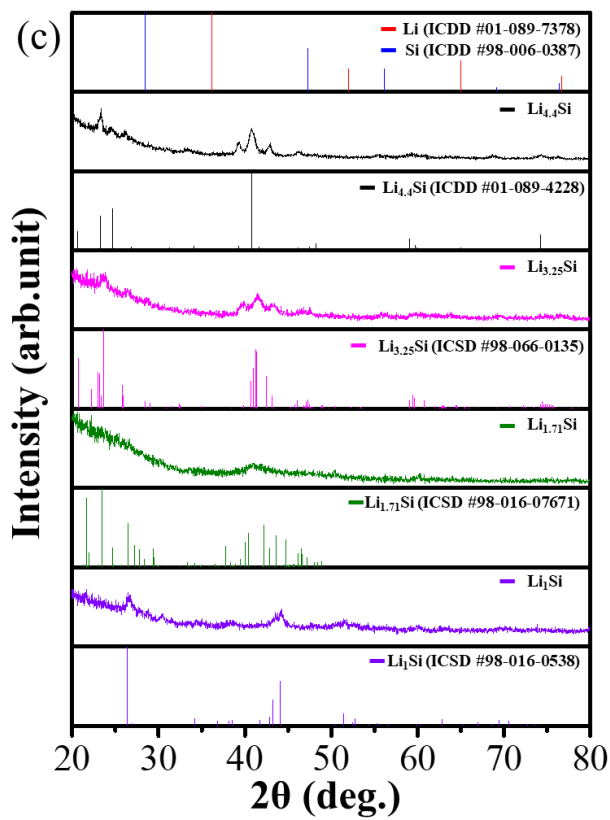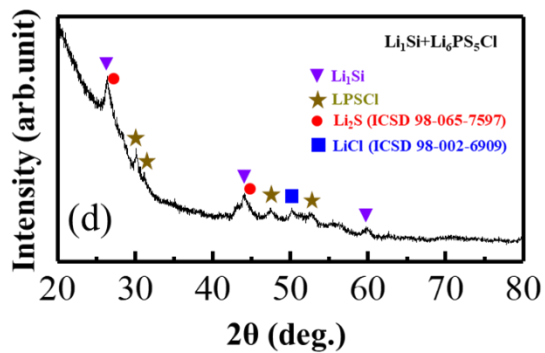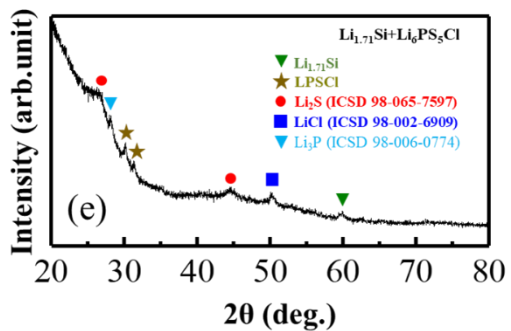

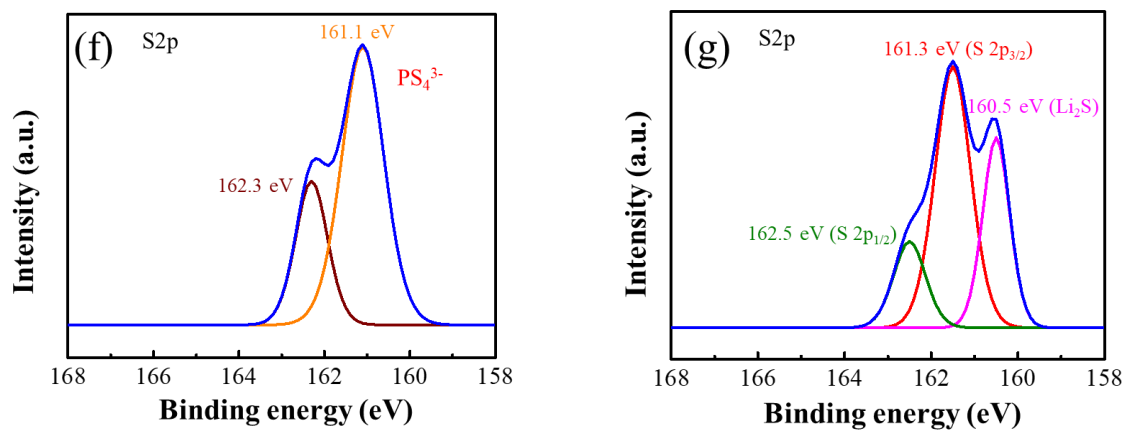

**Fig. S1** X-ray diffraction patterns of (a)  $\text{Li}_6\text{PS}_5\text{Cl}$  (LPSCl; solid electrolyte), (b) sulfur composite cathode, (c)  $\text{Li}_x\text{Si}$  ( $x = 1.0, 1.17, 3.25, \text{ and } 4.4$ ), (d)  $\text{Li}_{1.0}\text{Si}+\text{LPSCl}$ , and (e)  $\text{Li}_{1.71}\text{Si}+\text{LPSCl}$  powders obtained after planetary ball milling; X-ray photoelectron spectroscopy spectra of (f) a pristine LPSCl pellet and (g) the LPSCl SE surface detached from a  $\text{Li}_{1.71}\text{Si}$  anode cell.

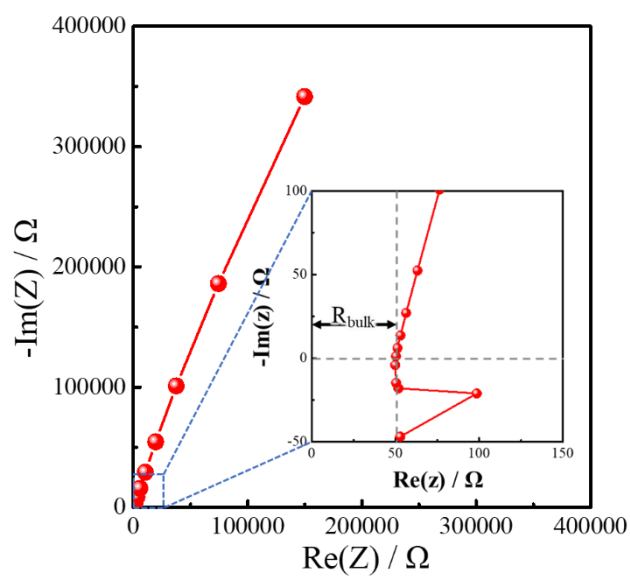

**Fig. S2** Impedance spectrum of an LPSCl disk.

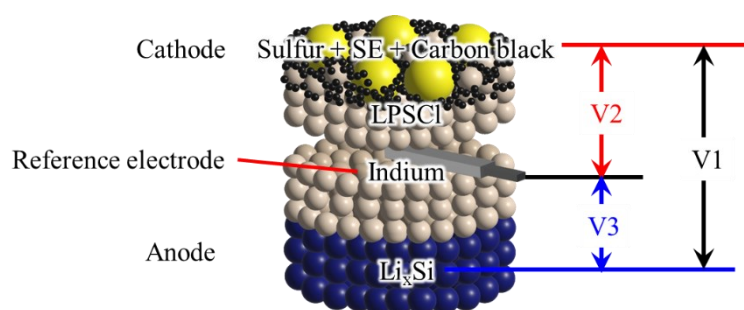

**Fig. S3** Schematic of the three-electrode cell fabricated in this study and measured potentials (V1, V2, V3).

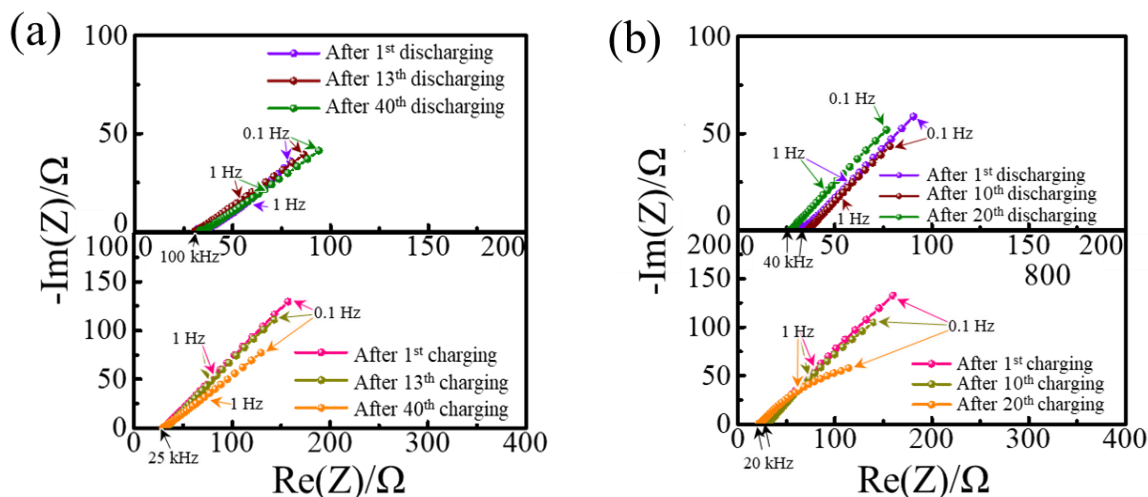

**Fig. S4** Impedance spectra of cells with a  $\text{Li}_{3.25}\text{Si}$  anode and (a) an anode-to-cathode capacity (N/P) ratio of 3.89 recorded after the first, 13<sup>th</sup>, and 40<sup>th</sup> discharge (charge) and (b) an N/P ratio of 3.0 recorded after the first, 10<sup>th</sup>, and 20<sup>th</sup> discharge (charge).

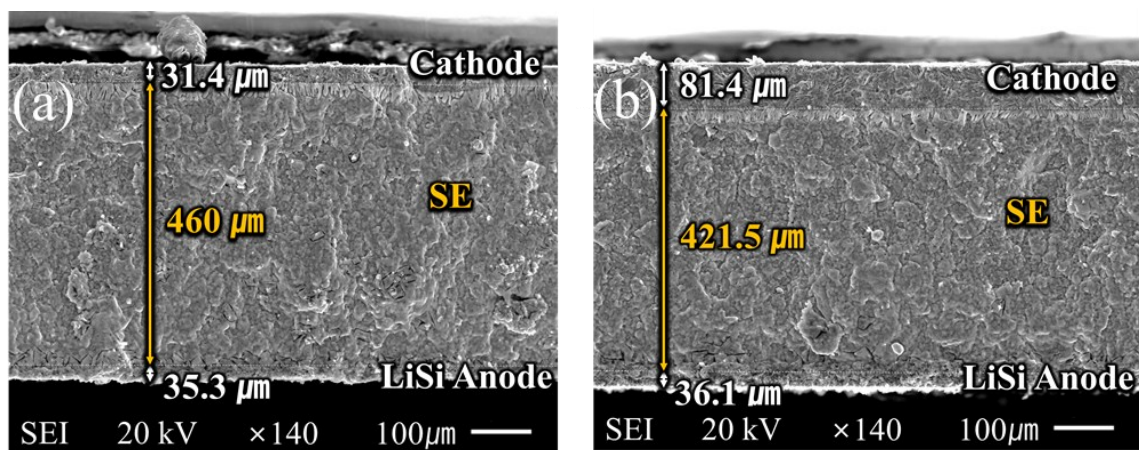

**Fig. S5** Scanning electron microscopy (SEM) images of cross-sectioned cells with a  $\text{Li}_{1.0}\text{Si}$  anode and N/P ratios of (a) 3.89 and (b) 1.2.

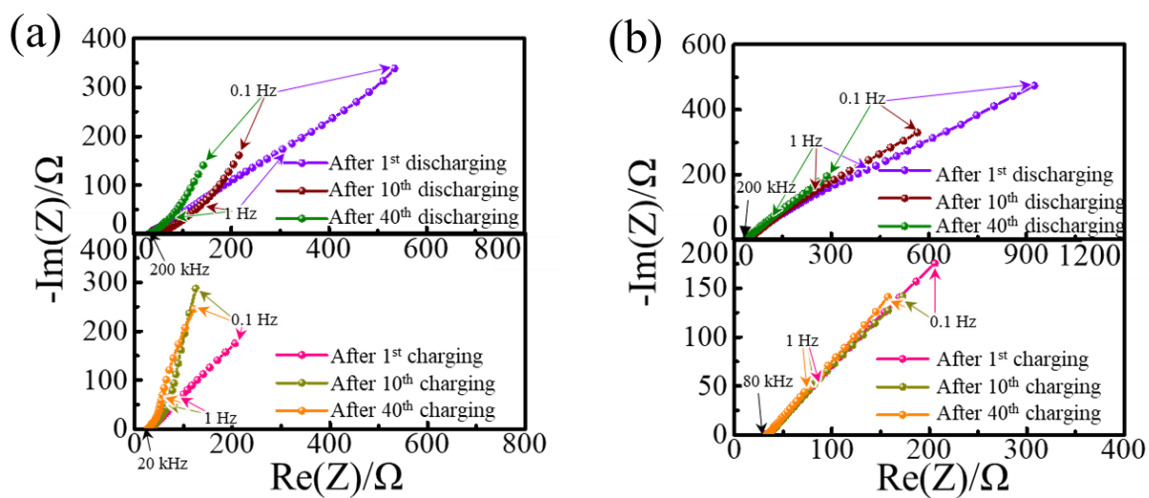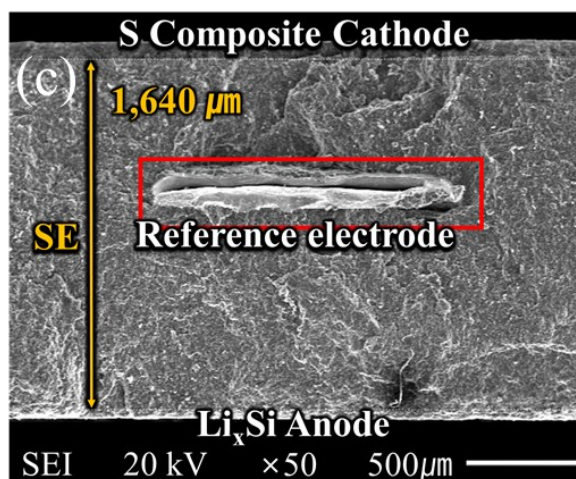

**Fig. S6** Impedance spectra of cells with a Li<sub>1.0</sub>Si anode and N/P ratios of (a) 3.89 and (b) 1.2 recorded after the first, 10<sup>th</sup>, and 40<sup>th</sup> discharge (charge). (c) Cross-sectional SEM image of a three-electrode Li<sub>1.0</sub>Si anode cell with an N/P ratio of 1.2.

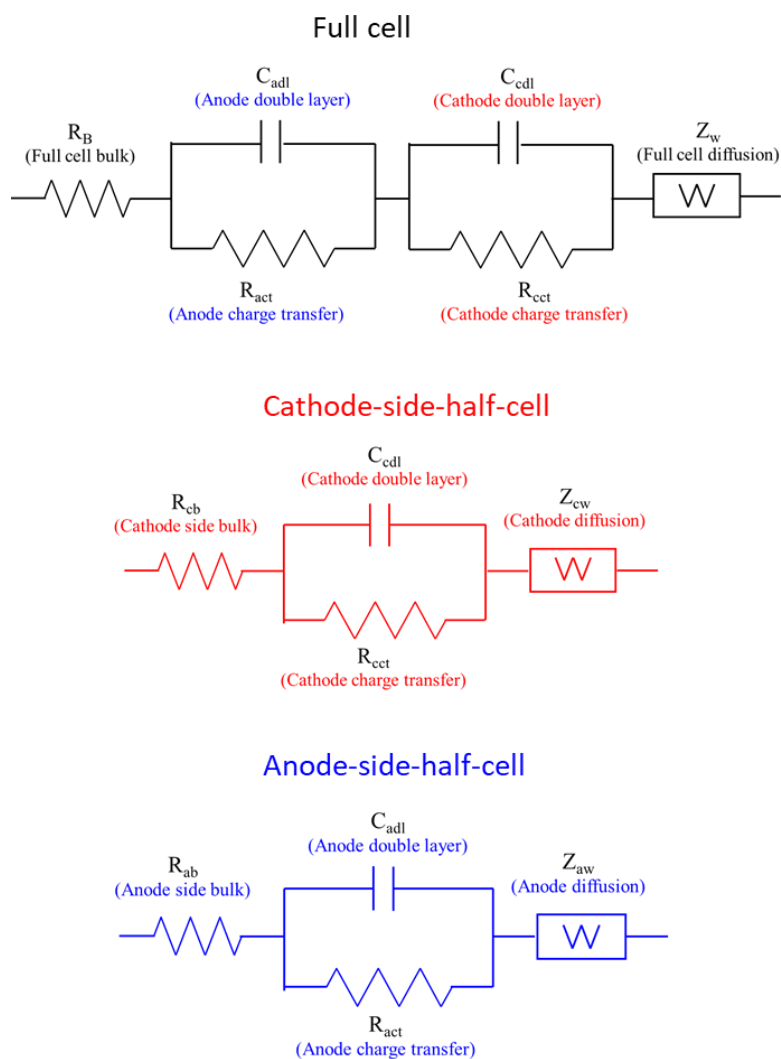

**Fig. S7** Equivalent circuit models for the full cell (V1), cathode-side half-cell (V2), and anode-side half-cell (V3) of a three-electrode cell.

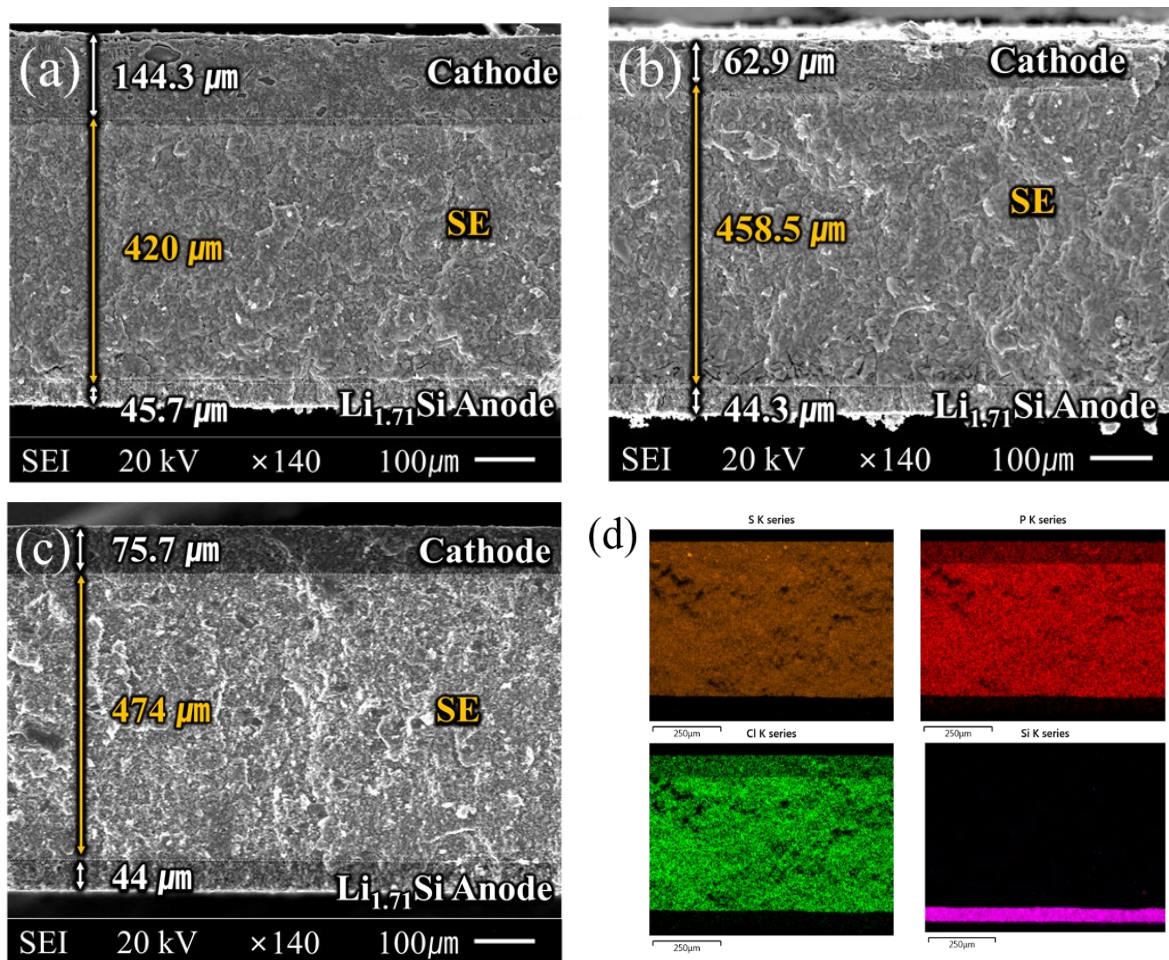

**Fig. S8** Cross-sectional SEM images of  $\text{Li}_{1.71}\text{Si}$  anode cells with N/P ratios of (a) 1.2, (b) 3.89, and (c) 2.05. (d) S, P, Cl, and Si distributions from the energy-dispersive X-ray spectroscopy (EDS) mapping of (c).



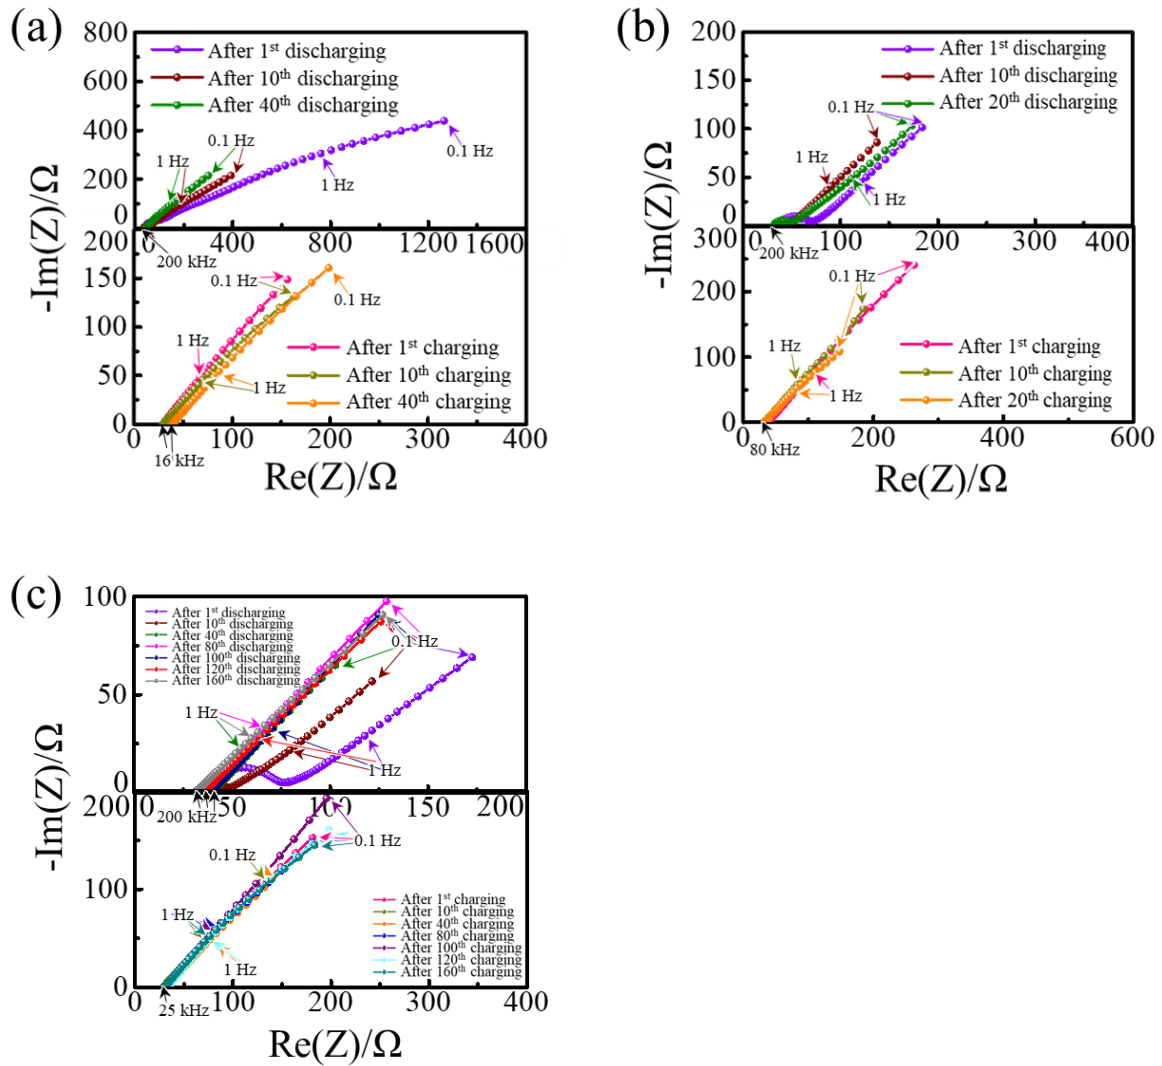

**Fig. S9** Impedance spectra of  $\text{Li}_{1.71}\text{Si}$  anode cells with (a) an N/P ratio of 1.2 recorded after the first, 10<sup>th</sup>, and 40<sup>th</sup> discharge (charge), (b) an N/P ratio of 3.89 recorded after the first, 10<sup>th</sup>, and 20<sup>th</sup> discharge (charge), and (c) an N/P ratio of 2.05 recorded after the first, 10<sup>th</sup>, 40<sup>th</sup>, 80<sup>th</sup>, 100<sup>th</sup>, 120<sup>th</sup>, and 160<sup>th</sup> discharge (charge).

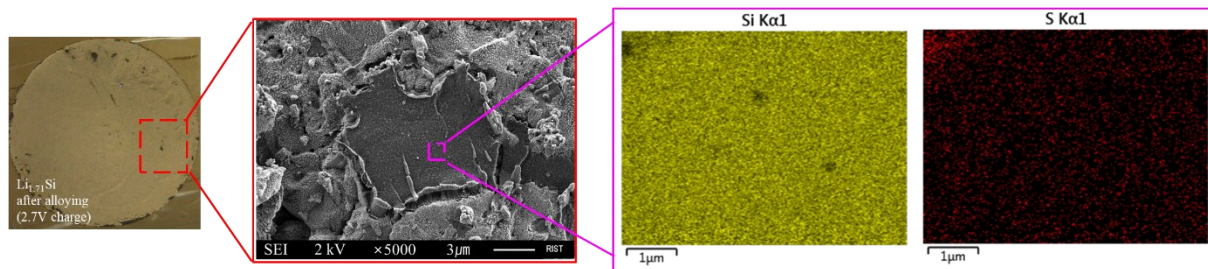

**Fig. S10** Digital microscopy (left) and SEM–EDS images (middle and right) of the solid electrolyte surface detached from the  $\text{Li}_{1.71}\text{Si}$  anode cell (N/P ratio = 2.05) cycle-tested at a constant current of  $1000 \mu\text{A}$  for 17 cycles.

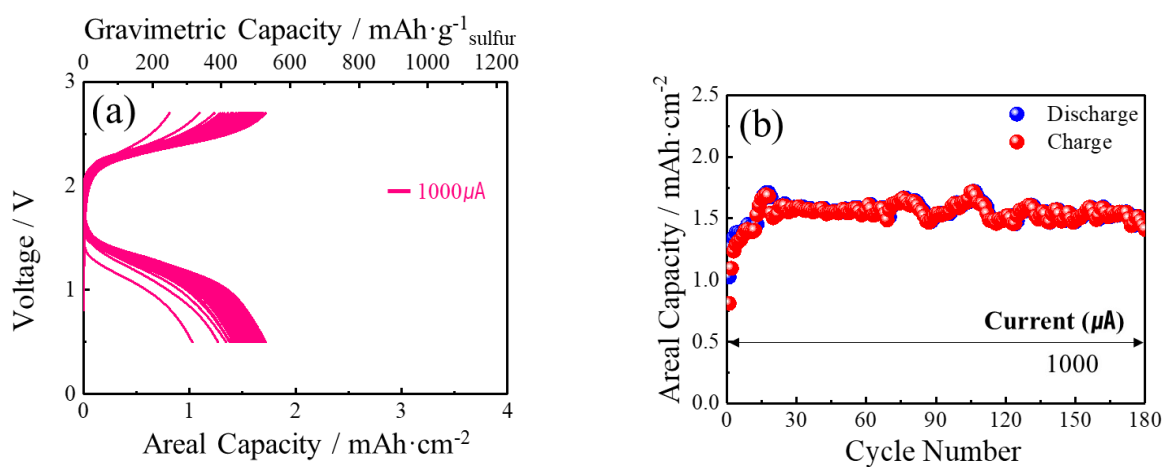

**Fig. S11** (a) Discharge–charge curves and (b) areal capacity–cycle number plots of the  $\text{Li}_{1.71}\text{Si}$  anode cell (N/P ratio = 2.05) cycle-tested at a constant current of  $1000 \mu\text{A}$  for 180 cycles.

**Table S1.** N/P ratios and mass loadings of the cathode and anode active materials in cells with different  $\text{Li}_x\text{Si}$  anodes ( $x = 1.0, 1.71, \text{ and } 3.25$ ).

| $\text{Li}_x\text{Si}$      | N/P ratio | Mass loading of cathode active material [ $\text{mg}/\text{cm}^2$ ] | Mass loading of anode active material [ $\text{mg}/\text{cm}^2$ ] |
|-----------------------------|-----------|---------------------------------------------------------------------|-------------------------------------------------------------------|
| $\text{Li}_1\text{Si}$      | 1.2       | 3.25                                                                | 6.49                                                              |
|                             | 3.89      | 1.01                                                                | 6.49                                                              |
| $\text{Li}_{1.71}\text{Si}$ | 1.2       | 5.52                                                                | 6.49                                                              |
|                             | 2.05      | 3.25                                                                | 6.49                                                              |
|                             | 3.89      | 1.79                                                                | 6.49                                                              |
| $\text{Li}_{3.25}\text{Si}$ | 3.89      | 3.25                                                                | 6.49                                                              |
|                             | 3         | 4.22                                                                | 6.49                                                              |

**Table S2.** Mechanical alloying conditions used to prepare  $\text{Li}_x\text{Si}$  ( $x = 1.0, 1.71, 3.25, \text{ and } 4.4$ ).

| $\text{Li}_x\text{Si}$      | BPR   | Rotation speed [rpm] | Milling time [h] |
|-----------------------------|-------|----------------------|------------------|
| $\text{Li}_1\text{Si}$      | 330:1 | 370                  | 30               |
| $\text{Li}_{1.71}\text{Si}$ | 330:1 |                      | 30               |
| $\text{Li}_{3.25}\text{Si}$ | 110:1 |                      | 2.5              |
| $\text{Li}_{4.4}\text{Si}$  | 110:1 |                      | 2.5              |
